# Supplementary material for: MtDNA variations at C5178a and A249d decrease the risk of severe COVID-19 in a Han Chinese population from Central China
Source: Research Square preprint supplement (doi:10.21203/rs.3.rs-285889/v1), 2021-03-06
Supplement: Supplementary file 2 [file 69b2651e79e526ff09b35cae.docx]

**Supplementary Table 1**

The primers used for PCR-RFLPs and HVS-I sequencing

| Primer number | Sequences (5’-3’) |
| --- | --- |
| Primer 1-F | AACCAAACCCCAAAGACACC |
| Primer 1-R | ATCCACCTTCGACCCTTAAG |
| Primer 2-F | GTAAGCGCAAGTACCCACG |
| Primer 2-R | ATTGGTGGCTGCTTTTAGGC |
| Primer 3-F | AATTTGCCCACAGAACCCTC |
| Primer 3-R | GACTCTAGAATAGGATTGCGC |
| Primer 4-F | GTCCTAAACTACCAAACCTGC |
| Primer 4-R | ATGATGGCTAGGGTGACTTC |
| Primer 5-F | CGCTCTTCTACTATGAACCC |
| Primer 5-R | TGTGCCTGCAAAGATGGTAG |
| Primer 6-F | ATAATAGGAGCTTAAACCCCC |
| Primer 6-R | GTGTTAGTCATGTTAGCTTG |
| Primer 7-F | AGCAGTTCTACCGTACAACC |
| Primer 7-R | TAAGGAGGCTTAGAGCTGTG |
| Primer 8-F | GAAAATCACCTCGGAGCTGG |
| Primer 8-R | TGTGCTCACACGATAAACCC |
| Primer 9-F | ACCTCAACACCACCTTCTTC |
| Primer 9-R | TTTGAAAAAGTCATGGAGGCC |
| Primer 10-F | GATTTGAGAAGCCTTCGCTTC |
| Primer 10-R | GCTATAGGGTAAATACGGGC |
| Primer 11-F | TCTTGCACTCATGAGCTGTC |
| Primer 11-R | CCAATTAGGTGCATGAGTAGG |
| Primer 12-F | CTCATTTACACCAACCACCC |
| Primer 12-R | GCCAATAATGACGTGAAGTCC |
| Primer 13-F | TCCCACTCCTAAACACATCC |
| Primer 13-R | GTTGAGGGTTATGAGAGTAGC |
| Primer 14-F | TCTGGCCTATGAGTGACTAC |
| Primer 1-R | AAGTGGAGTCCGTAAAGAGG |
| Primer 15-F | TTCACAGCCACAGAACTAATC |
| Primer 15-R | AAACCCGGTAATGATGTCGG |
| Primer 16-F | GCCCACGGGCTTACATC |
| Primer 16-R | AAACCGATATCGCCGATACG |
| Primer 17-F | TCGTTACATGGTCCATCATAG |
| Primer 17-R | AAGCGAGGTTGACCTGTTAG |
| Primer 18-F | TCCATCATCCACAACCTTAAC |
| Primer 18-R | GATTGTTAGCGGTGTGGTCG |
| Primer 19-F | TCTTCCCACTCATCCTAACC |
| Primer 19-R | CCCCTCAGAATGATATTTGGC |
| Primer 20-F | TCCAACATCTCCGCATGATG |
| Primer 20-R | TCTCCGGTTTACAAGACTGG |
| Primer 21-F | TTCGCCTACACAATTCTCCG |
| Primer 21-R | ACAGATACTGCGACATAGGG |
| Primer 22-F | GTCAAATCCCTTCTCGTCCC |
| Primer 22-R | TTTATGGGGTGATGTGAGCC |
